# Supplementary material for: In-utero exposure to tenofovir disoproxil fumarate pre-exposure prophylaxis and growth metrics in HIV unexposed breastfed infants in South Africa: a post hoc analysis of the CAP 016 PrEP in pregnancy RCT
Source: PubMed Central journal article supplement (PMC11341386; doi:10.3389/fped.2024.1447173), 2024-08-09
Supplement: Table1.pdf [file Table1.pdf]

*Supplementary Table 1: Maternal TNF-DP Dose effect on Infant Growth Outcomes between Birth and 18 months of age*

| <b>WAZ mean (SD)</b>  | <b>n</b> | <b>BLQ</b>   | <b>n</b> | <b>0_200</b> | <b>n</b> | <b>200_400</b> | <b>n</b> | <b>400_600</b> | <b>n</b> | <b>&gt;600</b> | <b>p value</b> |
|-----------------------|----------|--------------|----------|--------------|----------|----------------|----------|----------------|----------|----------------|----------------|
| Birth                 | 35       | -0.32 (1.15) | 62       | -0.37 (1.04) | 41       | 0.05 (1.32)    | 48       | -0.35 (1.21)   | 40       | -0.69 (0.98)   | 0.051          |
| 6 wks                 | 21       | 0.19 (1.30)  | 43       | 0.43 (1.21)  | 23       | 0.62 (1.02)    | 35       | 0.004 (1.50)   | 30       | 0.01 (0.78)    | 0.077          |
| 6 mths                | 16       | 1.24 (1.15)  | 25       | 0.87 (1.09)  | 22       | 1.27 (0.88)    | 27       | 0.47 (1.03)    | 24       | 0.82 (1.22)    | 0.055          |
| 12 mths               | 10       | 1.31 (1.57)  | 19       | 1.26 (0.92)  | 17       | 1.39 (1.16)    | 22       | 0.43 (0.90)    | 16       | 0.91 (1.36)    | 0.075          |
| 18 mths               | 12       | 1.25 (1.14)  | 28       | 1.07 (1.28)  | 16       | 0.87 (0.81)    | 23       | 0.51 (1.43)    | 15       | 0.86 (1.74)    | 0.384          |
| <b>LAZ mean (SD)</b>  |          |              |          |              |          |                |          |                |          |                |                |
| Birth                 | 36       | 0.14 (1.30)  | 60       | 0.08 (1.12)  | 41       | 0.42 (1.66)    | 48       | -0.14 (1.39)   | 39       | -0.30 (1.30)   | 0.052          |
| 6 wks                 | 21       | -1.12 (1.62) | 43       | -0.79 (1.22) | 23       | -0.55 (0.93)   | 35       | -1.17 (1.54)   | 30       | -1.18 (1.14)   | 0.114          |
| 6 mths                | 15       | 0.15 (1.18)  | 25       | -0.34 (1.24) | 22       | 0.22 (0.96)    | 27       | -0.74 (1.22)   | 24       | -0.32 (1.27)   | 0.042          |
| 12 mths               | 10       | -0.30 (1.47) | 19       | -0.08 (1.15) | 17       | 0.02 (1.13)    | 22       | -0.96 (1.16)   | 16       | -0.22 (1.49)   | 0.117          |
| 18 mths               | 12       | -1.04 (1.54) | 28       | -0.81 (1.37) | 16       | -0.38 (1.18)   | 22       | -1.05 (2.01)   | 15       | -0.86 (1.98)   | 0.437          |
| <b>WLZ mean (SD)</b>  |          |              |          |              |          |                |          |                |          |                |                |
| Birth                 | 34       | -0.64 (1.31) | 59       | -0.69 (1.47) | 40       | -0.46 (2.31)   | 45       | -0.40 (1.67)   | 38       | -0.79 (1.64)   | 0.758          |
| 6 wks                 | 21       | 1.87 (1.21)  | 43       | 1.69 (1.64)  | 23       | 1.66 (1.28)    | 34       | 1.56 (1.37)    | 30       | 1.65 (1.35)    | 0.969          |
| 6 mths                | 15       | 1.52 (0.83)  | 25       | 1.53 (1.22)  | 22       | 1.59 (0.96)    | 27       | 1.31 (0.98)    | 24       | 1.94 (1.39)    | 0.731          |
| 12 mths               | 10       | 1.94 (1.36)  | 19       | 1.73 (0.95)  | 17       | 1.84 (1.43)    | 22       | 1.20 (0.79)    | 16       | 1.35 (1.04)    | 0.276          |
| 18 mths               | 12       | 2.29 (0.98)  | 28       | 1.92 (1.42)  | 16       | 1.41 (0.80)    | 22       | 1.37 (1.09)    | 15       | 1.70 (1.42)    | 0.167          |
| <b>HCAZ mean (SD)</b> |          |              |          |              |          |                |          |                |          |                |                |
| Birth                 | 36       | 0.39 (0.95)  | 59       | 0.49 (1.17)  | 41       | 0.91 (1.17)    | 48       | 0.39 (1.41)    | 39       | -0.06 (1.16)   | 0.011          |
| 6 wks                 | 21       | 0.15 (1.99)  | 43       | 0.25 (1.55)  | 23       | 0.79 (1.36)    | 35       | 0.28 (1.87)    | 30       | -0.40 (1.31)   | 0.132          |
| 6 mths                | 16       | 1.60 (1.38)  | 25       | 0.65 (1.44)  | 22       | 1.69 (1.14)    | 27       | 1.06 (1.30)    | 24       | 1.32 (1.25)    | 0.057          |
| 12 mths               | 10       | 1.22 (1.09)  | 19       | 1.64 (1.42)  | 17       | 1.76 (1.44)    | 22       | 1.14 (1.45)    | 16       | 1.40 (0.90)    | 0.704          |
| 18 mths               | 12       | 1.59 (1.39)  | 28       | 1.46 (1.65)  | 16       | 1.57 (1.08)    | 23       | 1.39 (1.79)    | 15       | 0.84 (0.95)    | 0.474          |

*BLQ=below level of quantification, 0-200 fmol/punch, 200-400 fmol/punch, 400-600 fmol/punch and >600 fmol/punch*

*WAZ=Weight-for-age z-score, LAZ=Length-for-age z-score, WLZ=weight-for-length z-score, HCAZ=Head circumference-for-age z-score*
